# Supplementary material for: Ternary tin-doped titanium dioxide/calcium oxide (Sn-TiO2/CaO) composite as a photocatalyst for efficient removal of toxic dyes
Source: Royal Society of Chemistry journal article supplement (doi:10.1039/d4ra03641g), 2024-01-01
Supplement: d4ra03641g1.pdf [file d4ra03641g1.pdf]

## Electronic Supplementary Material:

### 1. Characterization methods

X-ray diffraction analysis (XRD) had recorded with a Philips PW1730 diffractometer with Ni filter and graphite monochromator. This device uses Cu  $k\alpha$  radiation (wave-length = 1.15 Å) as an X-ray source. The scan area is  $2\theta = 10^\circ\text{--}80^\circ$  at 45 kV and 50 mA with a  $0.06^\circ$   $2\theta$ -step and 1 s per step.

Fourier transform infrared (FT-IR) spectroscopy had used for the identification of chemical bonds in the prepared catalysts. FT-IR spectra had recorded on a Nicolet iS 10 FTIR spectrometer, in the wavenumber of 400–4000  $\text{cm}^{-1}$ .

UV–Vis diffuse reflectance (UV–Vis DRS) had carried out on an Evolution 300 UV-vis spectrophotometer using  $\text{BaSO}_4$  as a reference. The power catalysts had evaluated in 200–800 nm at room temperature.

To characterize the surface areas and porosity,  $\text{N}_2$  adsorption–desorption isotherm had obtained by BELSORP Mini II using the outgassed sample under vacuum at 623 K for 10 h before the measurements. The specific surface area (SBET) and the volume of the adsorbed monolayer ( $V_p$ ) had evaluated by the BET equation and by assuming an  $\text{N}_2$  molecule to cover 0.162  $\text{nm}^2$ , respectively. The Barret-Joyner-Halenda (BJH) method had also used for calculating the average pore diameter ( $d_p$ ).

The morphology of catalyst had investigated on a VEGA3 with an accelerating voltage of 30 kV.
